# Supplementary material for: The structure and vibrational dynamics of the pyrrole dimer
Source: Royal Society of Chemistry journal article supplement (doi:10.1039/b822764k), 2009-01-01
Supplement: b822764k.pdf [file b822764k.pdf]

# The structure and vibrational dynamics of the pyrrole dimer.

## Supplementary information

Martin Kabeláč,<sup>a</sup> Pavel Hobza<sup>a,b</sup> and Vladimír Špirko\*

*<sup>a</sup>Institute of Organic Chemistry and Biochemistry, v.v.i,  
Academy of Sciences of the Czech Republic,  
Center for Biomolecules and Complex Molecular Systems,*

*Flemingovo nám. 2,  
160 10 Prague 6, Czech Republic,*

*and*

*<sup>b</sup>Department of Physical Chemistry,  
Palacký University,  
771 46 Olomouc, Czech Republic*

---

\*E-mail: spirko@marge.uochb.cas.cz;

The empirical potential energy function used to fit the CCSD(T) data of the pyrrole dimer (see **Table A**)

$$V(R, \rho, \sigma) = \sum_{k,l,m} C(k, l, m) \{\exp[-a_R(R - R_r)]\}^k \times \{\cos \rho\}^l \times \{\cos \sigma\}^m \quad (1)$$

**Table A** The potential energy function parameters (in  $\text{cm}^{-1}$ ) of the pyrrole dimer obtained by fitting to the *ab initio* data<sup>a</sup>

| <i>k l m</i> | $C(k, l, m)$ |
|--------------|--------------|--------------|--------------|--------------|--------------|--------------|--------------|
| 0 0 0        | 12289.69     | 1 1 2        | 592345.40    | 0 0 5        | -1326199.73  | 0 6 6        | 1949003.68   |
| 1 0 0        | 4993.59      | 2 2 2        | 747929.00    | 0 1 5        | -7224232.27  | 0 0 7        | -636903.25   |
| 0 1 0        | 50480.92     | 0 4 2        | 605065.85    | 2 0 5        | -4866265.11  | 1 0 7        | 799506.60    |
| 1 1 0        | 69057.95     | 0 5 2        | 1484085.94   | 1 1 5        | 15690616.63  | 0 1 7        | -3372205.80  |
| 3 0 0        | 7986.37      | 0 0 3        | 825698.23    | 0 2 5        | -1290591.33  | 2 0 7        | -10987971.29 |
| 1 2 0        | 162943.11    | 1 0 3        | -875925.66   | 3 0 5        | 1100547.46   | 1 1 7        | 7662544.15   |
| 0 3 0        | -217816.14   | 0 1 3        | 2443584.43   | 2 1 5        | -11576215.67 | 3 0 7        | 3688554.03   |
| 4 0 0        | -3851.78     | 1 1 3        | -3643434.73  | 1 2 5        | 11208909.33  | 2 1 7        | -12444885.50 |
| 2 2 0        | -96117.39    | 2 1 3        | 1091245.69   | 0 6 5        | -2987477.78  | 1 2 7        | 6366540.62   |
| 0 4 0        | -259699.90   | 1 2 3        | -1698130.98  | 0 0 6        | 1793968.45   | 0 3 7        | 562382.21    |
| 2 3 0        | -129815.13   | 0 3 3        | -841312.22   | 1 0 6        | -1697147.20  | 2 0 8        | 3442001.13   |
| 1 4 0        | -142687.29   | 0 5 3        | -1054781.11  | 0 1 6        | 9038947.41   | 3 0 8        | -1329901.46  |
| 4 2 0        | 4643.21      | 0 0 4        | -385018.43   | 2 0 6        | 12306129.56  | 4 0 8        | -112268.29   |
| 3 3 0        | 12124.38     | 1 0 4        | 1766004.31   | 1 1 6        | -20441503.12 | 3 1 8        | -32108.54    |
| 0 6 0        | 90375.26     | 3 1 4        | 20548.17     | 0 2 6        | 1638718.80   | 2 2 8        | -3231984.54  |
| 0 1 1        | -71538.90    | 2 2 4        | -1564985.32  | 3 0 6        | -3470561.97  | 4 1 8        | 4709.52      |
| 2 0 1        | 109045.36    | 1 3 4        | 1951170.84   | 2 1 6        | 21434997.39  | 0 2 9        | -390097.03   |
| 1 1 1        | 79959.88     | 0 4 4        | -1802285.46  | 1 2 6        | -15969898.40 | 2 1 9        | 1495482.80   |
| 0 3 1        | 747739.39    | 2 3 4        | 154560.25    | 0 3 6        | -327490.66   | 4 0 9        | 74121.78     |
| 2 2 1        | -303149.89   | 1 4 4        | 662241.97    | 4 0 6        | 43162.10     | 2 2 9        | 1561790.89   |
| 1 3 1        | -258873.94   | 0 5 4        | -976410.49   | 2 2 6        | 2846299.86   | 1 3 9        | 1445650.56   |
| 0 4 1        | 742741.86    | 2 4 4        | 26921.21     | 1 3 6        | -2320447.25  | 0 4 9        | 731422.14    |
| 0 0 2        | -281331.71   | 1 5 4        | -49314.82    | 2 3 6        | -55901.08    | 0 5 9        | 655702.66    |
| 0 1 2        | -863936.59   | 0 6 4        | 1006095.40   | 1 4 6        | -574310.59   | 1 3 10       | -751368.23   |

<sup>a</sup> See Eq.(1) ( $a_R=0.838144 \text{ \AA}^{-1}$ ,  $R_r=4.2260 \text{ \AA}$ ).

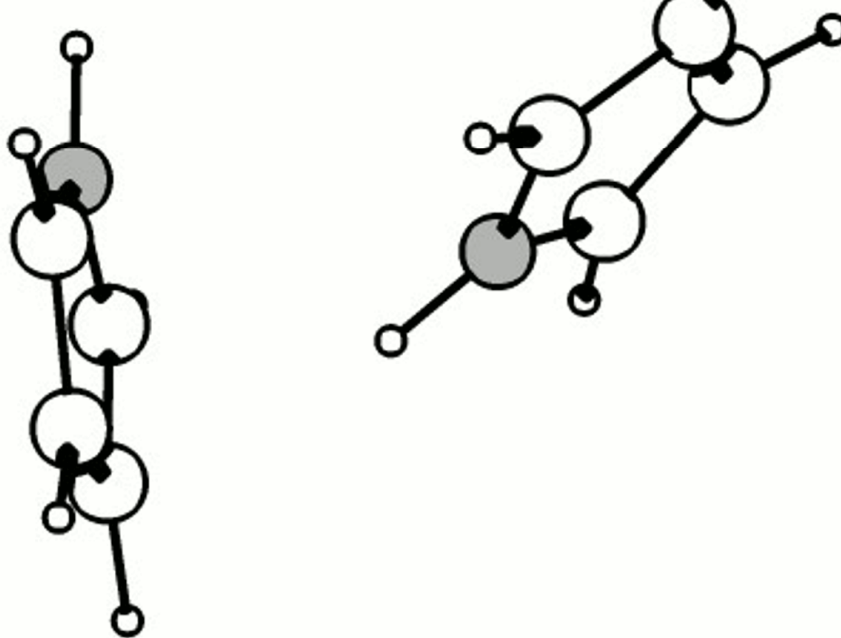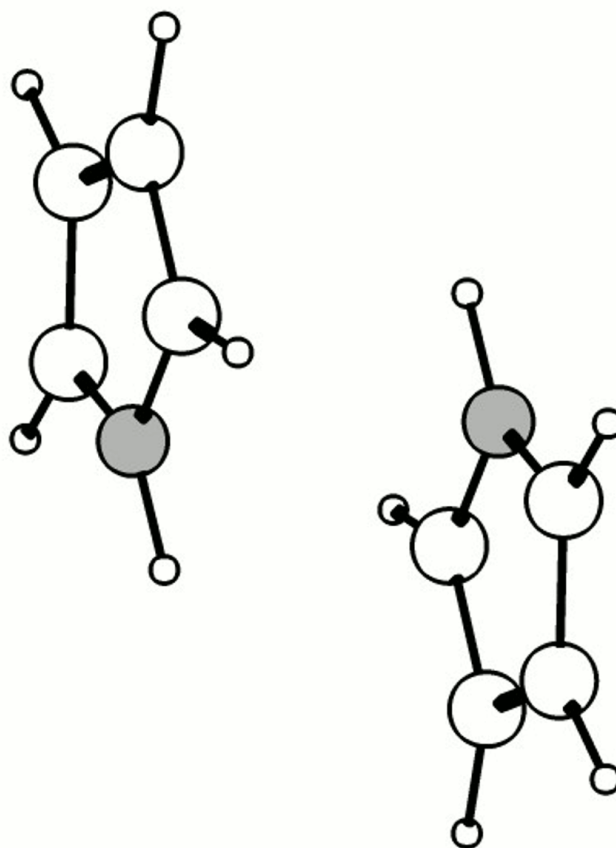

FIG. 1: The equilibrium (*T-shaped*) and transient (*parallel-displaced*) structures of the pyrrole dimer.

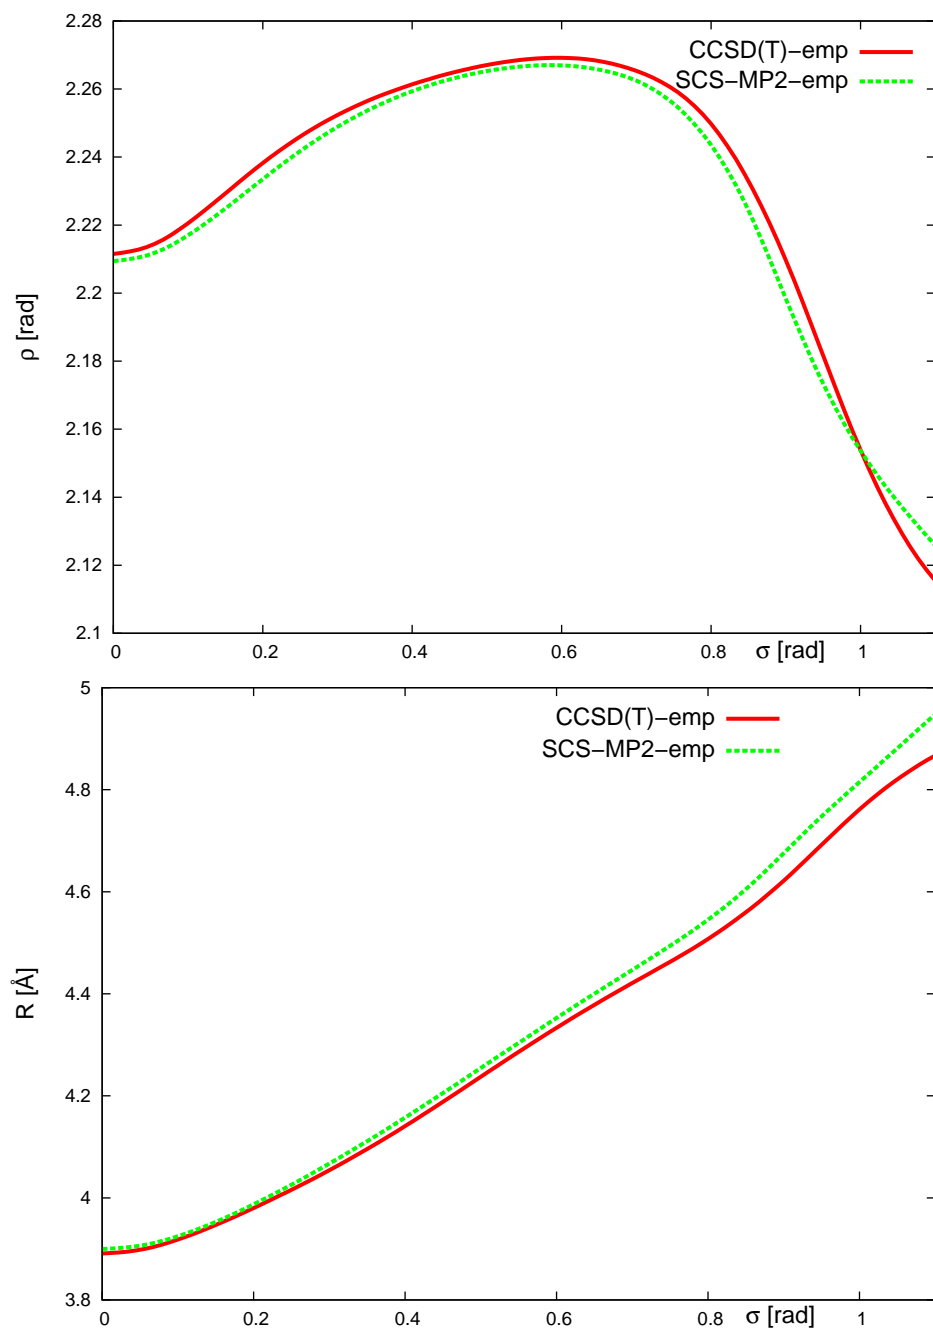

FIG. 2: The ‘energy minimum path’ values (calculated at the SCS-MP2/aug-cc-pVDZ and CCSD(T)/aug-cc-pVDZ level of theory) of the vibrational coordinates  $R$  and  $\rho$ .

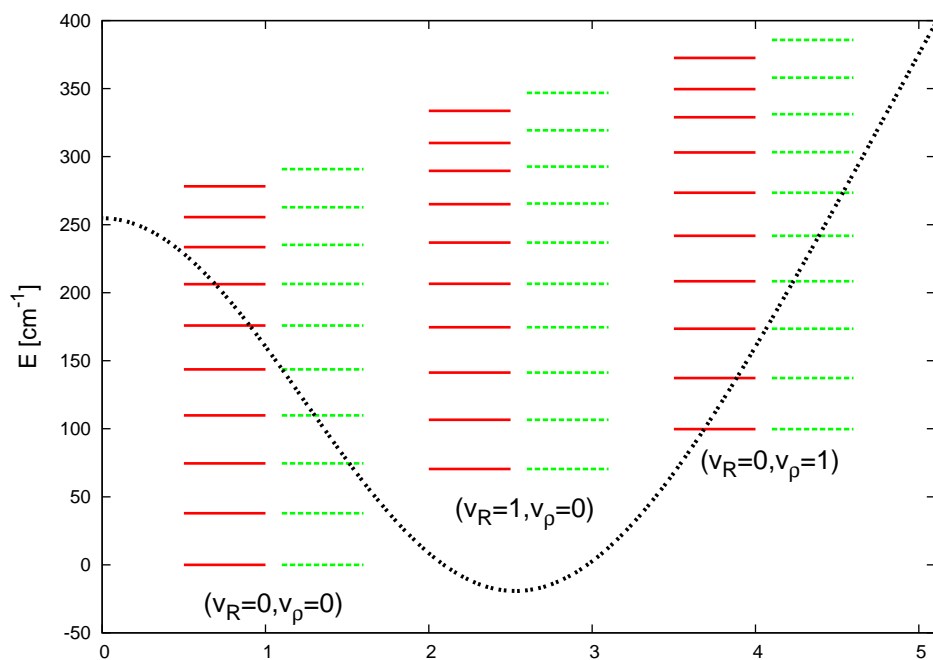

FIG. 3: The ‘interconverting’ energy patterns of the three lowest  $[v_R, v_\rho]$  states (with the symmetric levels plotted in red and antisymmetric levels plotted in green) and the CCSD(T) ‘ground state’  $V_{v_R=0, v_\rho=0}(\sigma)$  adiabatic potential (which is plotted in black).

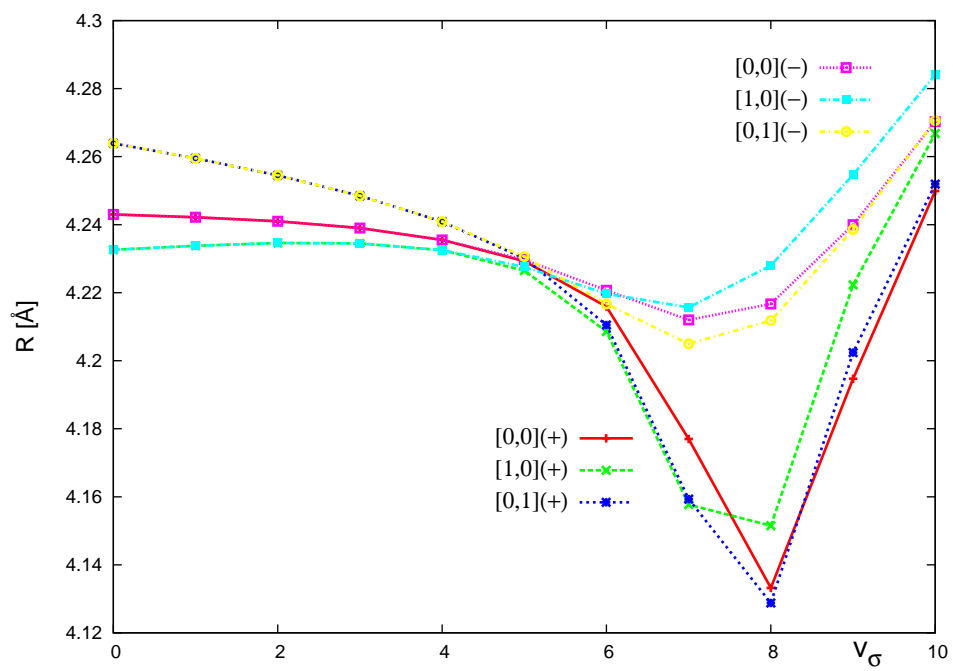

FIG. 4: The ‘interconverting’ average values of  $R$  for the three lowest vibrational states.

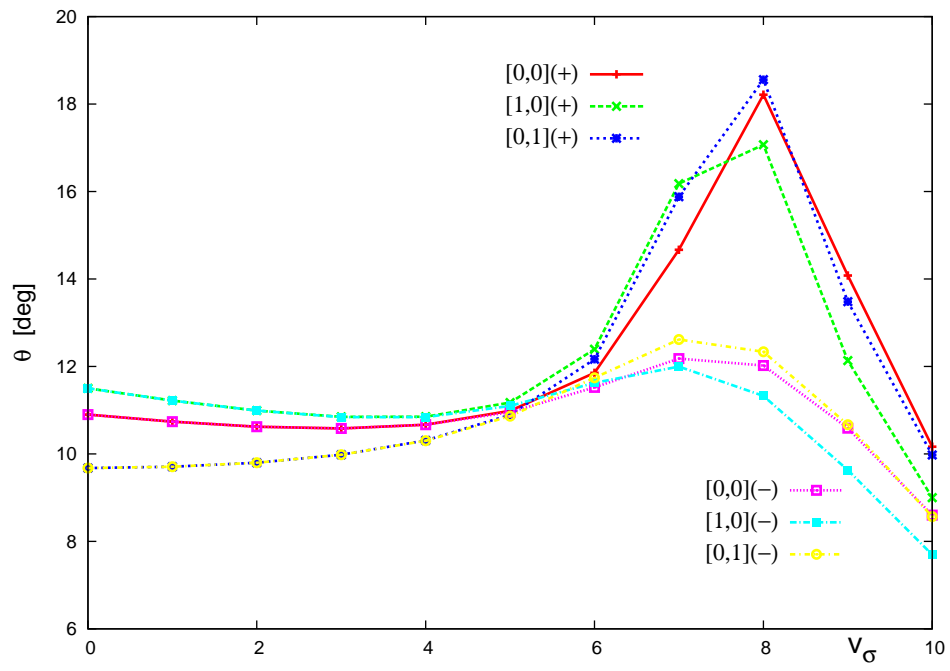

FIG. 5: The ‘interconverting’ average values of  $\theta$  for the three lowest vibrational states.
